# Supplementary material
Source: MDPI journal article supplement (https://www.mdpi.com/2306-5338/11/2/22)
Supplement: s1 [file s1]

**Supplementary Table S1: Land/ crop management data field wise**

**Table a: J1 63 (Example)**

|      | <b>Year</b> | <b>Date</b> | <b>Operation</b>                                           | <b>Amount</b>                              |
|------|-------------|-------------|------------------------------------------------------------|--------------------------------------------|
| 2012 | 1           | 10/11/2012  | Chisel plow or Disk                                        | Cross Slope                                |
| 2012 | 1           | NA          | Planted Wheat                                              | 20% Residue after Planting                 |
| 2012 | 1           | 11/7/2012   | Fertilizer application (method: Surface Broadcast) DRY     | 250 lb/ac (N:5%, P205:26% and K20:30%)     |
| 2013 | 2           | 5/22/2013   | Fertilizer application (method: Surface Broadcast) DRY     | 290lb/ac (N:38%, P205:0% and K20:3.7%)     |
| 2013 | 2           | 7/16/2013   | Harvest and Kill                                           | Wheat: yield 110bu/ac                      |
| 2013 | 2           | NA          | Fertilizer application                                     |                                            |
| 2013 | 2           | 9/21/2013   | Chisel plow or Disk                                        | primary tillage                            |
| 2014 | 3           | 5/9/2014    | Fertilizer application (method: Surface Broadcast) DRY     | 290lb/ac (N:30%, P205:7% and K20:3.14%)    |
| 2014 | 3           | 5/20/2014   | Planted Cron                                               | 20% Residue after Planting                 |
| 2014 | 3           | 5/20/2014   | Fertilizer application (method: Surface Broadcast) DRY     | 427 lb/ac (N:15.7%, P205:17.5% and K20:0%) |
| 2014 | 3           | 10/10/2014  | Harvest and Kill                                           | Cron (110bu/ac)                            |
| 2014 | 3           | 10/16/2014  | Fertilizer application (method: Surface Broadcast), Dry    | 200 lb/ac (N:5%, P205:26% and K20:30%)     |
| 2014 | 3           | 10/17/2014  | Chisel plow or Disk                                        | Cross Slopee                               |
| 2015 | 4           | 5/15/2015   | Planted soybean                                            |                                            |
| 2015 | 4           | NA          | Fertilizer application (method: Surface Broadcast), liquid | NA                                         |
| 2015 | 4           | 9/15/2015   | Harvest and Kill                                           | Soybean (57bu/ac)                          |
| 2015 | 4           | 9/15/2015   | Chisel Plow or disk                                        | primary tillage                            |
| 2015 | 4           | 9/15/2015   | Fertilizer application (method: Surface Broadcast), dry    | 250 lb/ac (N:5%, P205:26% and K20:30%)     |
| 2015 | 4           | 10/5/2015   | planted Wheat                                              |                                            |

|      |   |           |                                                               |                                                  |
|------|---|-----------|---------------------------------------------------------------|--------------------------------------------------|
| 2016 | 5 | 5/20/2016 | Fertilizer application<br>(method: Surface Broadcast), dry    | 290 lb/ac (N:38%,<br>P205:0% and K20:3.7%)       |
| 2016 | 5 | 7/20/2016 | Harvest and Kill                                              | Wheat (110 bu/ac)                                |
| 2016 | 5 | 9/16/2016 | Chisel plow or Disk                                           | primary tillage (Cross<br>slope)                 |
| 2016 | 5 | 9/15/2016 | Cron                                                          |                                                  |
| 2016 | 5 | 9/16/2016 | Fertilizer application<br>(method: Surface Broadcast), Dry    | 427 lb/ac (N:30%,<br>P205:7% and K20:14%)        |
| 2017 | 6 | 5/21/2017 | Fertilizer application<br>(method: Surface Broadcast), liquid | 170 lb/ac (N:15.7%,<br>P205:17.5% and<br>K20:0%) |
| 2017 | 6 | 8/16/2017 | Harvest and Kill                                              | Cron (110 bu/ac)                                 |

**Table b: J2 38 (Example)**

|      | Year | Date       | Operation                                                   | Amount                                        |
|------|------|------------|-------------------------------------------------------------|-----------------------------------------------|
| 2012 | 1    | 10/20/2012 | Fertilizer application<br>(method:Surface Broadcast) DRY    | 250 lb/ac (N:0%,<br>P205:40% and K20:60%)     |
| 2013 | 2    |            | No till                                                     |                                               |
| 2013 | 2    | 5/10/2013  | Fertilizer application<br>(method:Surface Broadcast) Dry    | 250 lb/ac (N: 21%, P205:<br>0% and K20: 0%)   |
| 2013 | 2    | 5/12/2013  | Planted Corn                                                |                                               |
| 2013 | 2    | 6/5/2013   | Fertilizer application<br>(method:Surface Broadcast) Liquid | 51 lgal/ac (N: 165%, P205:<br>0% and K20: 0%) |
| 2013 | 2    | 11/20/2013 | Harvest and Kill                                            | Corn: yield NA                                |
| 2014 | 3    |            | No till                                                     |                                               |
| 2014 | 3    | 5/15/2014  | Plant Soybean                                               |                                               |
| 2014 | 3    |            | No Fertilizer                                               |                                               |
| 2014 | 3    |            | Harvest and Kill                                            | Soybean: NA                                   |

|      |   |            |                    |             |
|------|---|------------|--------------------|-------------|
| 2015 | 4 |            | No till            |             |
| 2015 | 4 | 5/15/2015  | Plant Soybean      |             |
| 2015 | 4 |            | No Fertilizer      |             |
| 2015 | 4 |            | Harvest and Kill   | Soybean: NA |
| 2015 | 4 |            | No till            |             |
| 2015 | 4 | 10/25/2015 | Plant Winter wheat |             |
| 2016 | 5 |            | No Fertilizer      |             |

|      |   |            |                                                              |                                            |
|------|---|------------|--------------------------------------------------------------|--------------------------------------------|
| 2016 | 5 | 7/20/2016  | Harvest and Kill                                             | Winter Wheat : 102 bu/ac                   |
| 2016 | 5 | 10/20/2016 | Fertilizer application<br>(method:Surface Broadcast), Dry    | 200 lb/ac (N:0%,<br>P205:40% and K20:60%)  |
| 2017 | 6 |            | No till                                                      |                                            |
| 2017 | 6 | 5/10/2017  | Fertilizer application<br>(method:Surface Broadcast), Dry    | 250 lb/ac (N:21%,<br>P205:0% and K20:0%)   |
| 2017 | 6 | 5/15/2017  | Plant Cron                                                   | Residue after planting 60%<br>min          |
| 2017 | 6 | 6/5/2017   | Fertilizer application<br>(method:Surface Broadcast), liquid | 51 lgal/ac (N:165%,<br>P205:0% and K20:0%) |
| 2017 | 6 | 8/15/2017  | Harvest and Kill                                             | Cron (NA)                                  |

**Table S2. Field-wise description of existing non-structural land management BMPs in 2016-2017 with their modification parameters applied in the Jeannette Creek watershed SWAT model.**

| <b>BMP</b>         | <b>Modifications</b>                                                                                                                                                          | <b>Fields</b>                                                                                                                                                                                                                                                                                                       |
|--------------------|-------------------------------------------------------------------------------------------------------------------------------------------------------------------------------|---------------------------------------------------------------------------------------------------------------------------------------------------------------------------------------------------------------------------------------------------------------------------------------------------------------------|
| P banding          | FRT_SURF =0 .01<br>a) Fertilizer application efficiency assigned by user. (ferteff).<br>b) Reduction in amount of fertilizer C) Date or length of timing of the operation     | For J1 watershed:<br>2016: J166, J176 and J177.<br>2017: J150, J154, J156, J158, J168, J171, J172, J174, J178, J185, J186, J187, J190.<br><br>For J2 watershed: For 2016-17 this BMP is applied to all the fields except five fields (J2E4, J204, J205, J206, J224) where phosphorous is incorporated.              |
| P incorporation    | FRT_SURF =0.10<br>a) Fertilizer application efficiency assigned by user. (ferteff).<br>b) Reduction in amount of fertilizer.<br>C) Date or length of timing of the operation. | For J1 watershed:<br>2016: J151, J152, J153, J157, J159, J160, J161, J162, J163, J165, J174, J179, J180, J181, J182, J183 J190, J198.2017: J160, J163, J165, J173, J169, J175, J179, J180, J181, J182, J183, J188, J198, J173.<br><br>For J2 watershed:<br>2016: J224, J205.<br>2017: J2E4, J204, J205, J206, J224. |
| Variable rate of P | Change the timing of fertilizer, duration (days),                                                                                                                             | For J1 watershed: only applied 2016                                                                                                                                                                                                                                                                                 |

| <b>BMP</b>                             | <b>Modifications</b>                                                                                                                                                                                                                                         | <b>Fields</b>                                                                                                                                                                                            |
|----------------------------------------|--------------------------------------------------------------------------------------------------------------------------------------------------------------------------------------------------------------------------------------------------------------|----------------------------------------------------------------------------------------------------------------------------------------------------------------------------------------------------------|
|                                        | Application frequency,<br>amount of fertilizer                                                                                                                                                                                                               | J150, J156, J158, J168, J169                                                                                                                                                                             |
| Variable rate of P+ P<br>incorporation | Reduction P rate by 10%                                                                                                                                                                                                                                      | For J2 watershed: applied in 2017<br>J139, J141 and J232                                                                                                                                                 |
| Vegetative Buffer<br>Strips            | Change the scheduled<br>Management Operations<br>(.ops) file<br><br>a) FILTER_RATIO = 40<br>b) FILTER_CON = 0.5<br>c) FILTER_CH = 0                                                                                                                          | For J1 watershed: applied in 2016<br>Two field coded as J156.                                                                                                                                            |
| No-Till (possible<br>BMP)              | a) CN2 * 1 = CNOP<br>(presented table 7)<br>b) BIO MIX = 0.5<br>c) OV_N = 0.3<br>d) Update efficiency of the<br>harvest operation                                                                                                                            | Applied in all the field to check<br>the No Tillage BMP effectiveness.                                                                                                                                   |
| Below Canopy<br>application of P       | Reduction in Phosphorous<br>application                                                                                                                                                                                                                      | For J2 watershed: applied in 2016<br>Only in one field J238,                                                                                                                                             |
| Cover Crop (Cereal<br>Rye/Red Clover)  | Add cover crop after<br>harvesting;<br><br>a) Reduction in Nitrogen<br>application (because cover<br>crop take nitrogen from air).<br>b) Update the CNOP<br>c) update the initial leaf area<br>index (Range:0-8) and Initial<br>dry wt biomass (Range 0-800) | For J1 watershed: applied<br>In 2016: Two fields of J169.<br>In 2017: J161, J162, J165, J169<br>For J2 watershed:<br>In 2016: J232, J234, J238. In 2017:<br>J207, J214, J215, J222, J232,<br>J238, J239. |
| Conservation Tillage                   | a) Tillage operation is<br>Change in Generic<br>conservation<br>b) The timing of the operation<br>c) CN2 * 1.04= CNOP<br>(presented table 7)<br>d) BIOMIX = 0.4<br>e) OV_N = 0.2                                                                             | For J1 watershed:<br>In 2016: J161, J162, J166, J168,<br>For J1 watershed:<br>In 2017: J157, J159, J161, J162,<br>J169, J180, J181, J182<br>For J2 watershed: applied in 2017<br>J212, J213, J204        |

| BMP | Modifications                                           | Fields |
|-----|---------------------------------------------------------|--------|
|     | d) Update efficiency of the harvest operation (harveff) |        |

**Table S3. Calibrated Flow, Sediment and Phosphorous parameters for the Jeannette Creek watershed SWAT modelling**

| Parameter | File Type | Description                                                                                           | Default Value | Model Range  | J1         |             | J2         |             |
|-----------|-----------|-------------------------------------------------------------------------------------------------------|---------------|--------------|------------|-------------|------------|-------------|
|           |           |                                                                                                       |               |              | Best value | Sensitivity | Best value | Sensitivity |
| SMTMP     | .bsn      | Snow melt base temperature (°C)                                                                       | 0.5           | -2 to 2      | -1.38      | Moderate    | -0.6       | Moderate    |
| SFTMP     | .bsn      | Snowfall temperature (°C)                                                                             | 1             | -2 to 2      | 0.06       | Moderate    | 0.6        | Moderate    |
| SMFMX     | .bsn      | Maximum melt factor for snow on June 21 (mm H <sub>2</sub> O °C <sup>-1</sup> day <sup>-1</sup> )     | 4.5           | 3 to 5       | 4.67       | High        | 4.5        | High        |
| SMFMN     | .bsn      | Minimum melt factor for snow on December 21 (mm H <sub>2</sub> O °C <sup>-1</sup> day <sup>-1</sup> ) | 4.5           | 3 to 5       | 3.09       | Moderate    | 3.7        | Moderate    |
| TIMP      | .bsn      | Snow pack temperature lag factor                                                                      | 1             | 0.5 to 1     | 0.8275     | Moderate    | 0.875      | Moderate    |
| CN2       | .mgt      | Initial SCS curve number for moisture condition II                                                    | Varies        | -2 to 2*     | 0.06       | Moderate    | -0.02      | Moderate    |
| ESCO      | .hru      | Soil Evaporation compensation factor                                                                  | 0.95          | 0.9 to 1     | 0.9795     | High        | 0.955      | High        |
| CH_N2     | .rte      | Manning's coefficient                                                                                 | 0.014         | -0.01 to 0.1 | 0.07255    | Moderate    | 0.0865     | Moderate    |

|              |      |                                                                                                                               |        |              |             |          |            |          |
|--------------|------|-------------------------------------------------------------------------------------------------------------------------------|--------|--------------|-------------|----------|------------|----------|
|              |      | for the main channel                                                                                                          |        |              |             |          |            |          |
| CH_K2        | .rte | Effective hydraulic conductivity in main channel alluvium (mm/hr)                                                             | 0      | 0 to 10      | 9.45        | High     | 7.5        | High     |
| SURLAG       | .hru | Surface runoff lag coefficient                                                                                                | 2      | 1 to 4       | 1.075       | High     | 1.15       | High     |
| GWQMN        | .gw  | Threshold depth of water in the shallow aquifer required for return flow to occur (mm H <sub>2</sub> O)                       | 1000   | 800 to 1200  | 1042        | Moderate | 860        | Moderate |
| GW_DELA<br>Y | .gw  | Groundwater delay time (days)                                                                                                 | 31     | 25 to 50     | 32.875      | Moderate | 36.25      | Moderate |
| GW_REVA<br>P | .gw  | Groundwater "revap" coefficient                                                                                               | 0.02   | 0.01 to 0.03 | 0.0167      | Moderate | 0.025      | Moderate |
| ALPHA_BF     | .gw  | Baseflow alpha factor                                                                                                         | 0.048  | 0.01 to 0.1  | 0.0167<br>5 | Moderate | 0.095<br>5 | Moderate |
| REVAPMN      | .gw  | Threshold depth of water in the shallow aquifer for "revap" or percolation to the deep aquifer to occur (mm H <sub>2</sub> O) | 750    | 400 to 600   | 427         | Moderate | 430        | Moderate |
| SOL_AWC      | .sol | Available water capacity of the soil layer (mm)                                                                               | Varies | -0.2 to 0.2* | 0.058*      | High     | 0.18       | High     |

|       |      |                                                        |        |              |         |          |       |          |
|-------|------|--------------------------------------------------------|--------|--------------|---------|----------|-------|----------|
|       |      | H <sub>2</sub> O/mm soil)                              |        |              |         |          |       |          |
| SOL_K | .sol | Saturated hydraulic conductivity (mm/hr)               | varies | -0.2 to 0.2* | -0.038* | Moderate | -0.02 | Moderate |
| RES_K | .res | Hydraulic conductivity of the reservoir bottom (mm/hr) | 0      | 0.1 to 1     | 0.549   | Moderate | 0.595 | Moderate |

**Sediment parameters for the (J1 &J2)**

| Parameter | File Type | Description                                                                                                             | Default Value | Model Range    | J1         |             | J2         |             |
|-----------|-----------|-------------------------------------------------------------------------------------------------------------------------|---------------|----------------|------------|-------------|------------|-------------|
|           |           |                                                                                                                         |               |                | best value | Sensitivity | best value | Sensitivity |
| SPCON     | .bsn      | Linear parameter for calculating the maximum amount of sediment that can be reentrained during channel sediment routing | 0.0001        | 0.0001 to 0.01 | 0.00707    | Moderate    | 0.008      | Moderate    |
| SPEXP     | .bsn      | Exponent parameter for calculating sediment reentrained in channel sediment routing                                     | 1             | 1.0 to 1.5     | 1.1175     | High        | 1.022      | Moderate    |
| ADJ_PKR   | .bsn      | Peak rate adjustment factor for sediment routing in the subbasin (tributary channels)                                   | 1             | 0.5 to 2       | 1.46       | Moderate    | 1.827      | Moderate    |
| PRF_BSN   | .bsn      | Peak rate adjustment factor for sediment routing in the main channel                                                    | 1             | 0 to 2         | 1.97       | Moderate    | 0.75       | Moderate    |

|          |        |                                                                                     |                  |              |       |          |       |          |
|----------|--------|-------------------------------------------------------------------------------------|------------------|--------------|-------|----------|-------|----------|
| CH_COV1  | .rte   | Channel erodibility factor                                                          | 0                | -0.05 to 0.6 | 0.369 | Moderate | 0.401 | High     |
| CH_COV2  | .rte   | Channel cover factor                                                                | 0                | -0.001 to 1  | 0.174 | High     | 0.564 | Moderate |
| USLE_K   | .sol   | USLE equation soil erodibility (K) factor                                           | Varies           | -0.1 to 0.1* | 0.077 | High     | 0.113 | High     |
| USLE_C   | .plant | Minimum value of USLE C factor for water erosion applicable to the land cover/plant | Varies           | -0.1 to 0.1* | 0.101 | Moderate | 0.073 | Moderate |
| USLE_P   | .mgt   | USLE support practice factor                                                        | 0.6              | 0. to 1      | 0.225 | Moderate | 0.345 | Moderate |
| RES_NSED | .res   | Equilibrium sediment concentration in the reservoir (mg/l)                          | 100              | 1 to 300     | 83.22 | High     | 150.5 | High     |
| RES_D50  | .res   | Median particle diameter of sediment ( $\mu\text{m}$ )                              | 10 $\mu\text{m}$ | 0 to 5       | 4.875 | High     | 3.875 | High     |

**Phosphorus parameters for J1 and J2 watershed**

| Parameter | File Type | Description                              | Unit                      | Model Range | J1         |             | J2         |             |
|-----------|-----------|------------------------------------------|---------------------------|-------------|------------|-------------|------------|-------------|
|           |           |                                          |                           |             | best value | Sensitivity | best value | Sensitivity |
| PPERCO    | .bsn      | Phosphorus percolation coefficient       | 10 $\text{m}^3/\text{Mg}$ | 10 to 17.5  | 15.9       | High        | 12.70      | High        |
| PSP       | .bsn      | Phosphorus availability index            | ---                       | 0.1 to 0.7  | 0.4        | High        | 0.3        | High        |
| PHOSKD    | .bsn      | Phosphorus soil partitioning coefficient | $\text{M}^3/\text{Mg}$    | 100-200     | 147.5      | Moderate    | 194.20     | High        |
| ERORGP    | .hru      | Organic P enrichment ratio               | ---                       | 0.00        | 0.00       | ----        | 0.00       | ----        |
| P_UPDIS   | .bsn      | Phosphorus uptake distribution parameter | ----                      | 0 to 100    | 84.5       | Moderate    | 62.25      | Moderate    |



**Table S4. Model performance for streamflow simulation at dauphin and deary pump outlet of J1 and J2 (Jeannette Creek) watershed monitoring stations**

| Station        | Period             | P-stat | r-stat | PBias  | R <sup>2</sup> | NSC  |
|----------------|--------------------|--------|--------|--------|----------------|------|
| J1 pump outlet | 1/1/2016-31/1/2017 | 0.33   | 0.28   | 48.20% | 0.33           | 0.23 |
| J2 pump outlet | 1/1/2016-31/1/2017 | 0.3    | 0.12   | 9.00%  | 0.71           | 0.6  |

**Table S5. Model performance for sediment simulation at dauphin and deary pump outlet and also at upstream outlet of J1 and J2 (Jeannette Creek) watershed monitoring stations**

| Station                                 | P-stat | r-stat | Item          | Sample | PBias | R <sup>2</sup> | NSC  |
|-----------------------------------------|--------|--------|---------------|--------|-------|----------------|------|
| J1 pump outlet                          | 0.44   | 1.05   | Concentration | 71     | -5.5  | 0.14           | 0.1  |
| J2 pump outlet                          | 0.87   | 1.35   | Concentration | 85     | 8.3   | 0.14           | 0.13 |
| J2 upstream just before the pump outlet | 0.82   | 2.62   | Concentration | 45     | 22.8  | 0.08           | 0.04 |
| J2 upstream (middle of the watershed)   | 0.14   | 0.41   | Concentration | 29     | 15.6  | 0.01           | -0.3 |

**Table S6. Model performance for phosphorus (organic and Mineral) calibration at dauphin and deary pump outlet of J1 and J2 (Jeannette Creek) watershed monitoring stations**

| Organic P             |                    |               |                  |        |        |       |       |                |
|-----------------------|--------------------|---------------|------------------|--------|--------|-------|-------|----------------|
| Station               | Period             | Item          | Samples (in day) | P-stat | r-stat | Bias  | NSC   | R <sup>2</sup> |
| <b>J1 Pump outlet</b> | 1/1/2016-31/1/2017 | Concentration | 71               | 0.42   | 1.04   | 15.7  | -0.12 | 0.01           |
| <b>J2 Pump outlet</b> | 1/1/2016-31/1/2017 | Concentration | 52               | 0.62   | 1.82   | 6     | 0.15  | 0.16           |
| Mineral P             |                    |               |                  |        |        |       |       |                |
| Station               | Period             | Item          | Samples          | P-stat | r-stat | Bias  | NSC   | R <sup>2</sup> |
| <b>J1 Pump outlet</b> | 1/1/2016-31/1/2017 | Concentration | 71               | 0.48   | 1.18   | -17.4 | 0.12  | 0.14           |
| <b>J2 Pump outlet</b> | 1/1/2016-31/1/2017 | Concentration | 52               | 0.77   | 85     | 22    | -0.03 | 0.03           |
